# Supplementary material
Source: publisher site journal article supplement (https://static.cambridge.org/content/id/urn:cambridge.org:id:article:S0924933820000401/resource/name/S0924933820000401supp001.pdf)
Supplement: Supplementary file [file S0924933820000401supp001.pdf]

Other supplementary material

Supplemental Table 1: Index offence of prisoners on remand (N=289)

| Offence                     | N   | %    |
|-----------------------------|-----|------|
| Violence against the person | 85  | 29.5 |
| Sexual offence              | 16  | 5.6  |
| Drug offence                | 33  | 11.4 |
| Other                       | 154 | 53.5 |

Note: missing data=1

Supplemental Table 2: Index offence of convicted prisoners (N=251)

| Offence                     | N  | %    |
|-----------------------------|----|------|
| Violence against the person | 33 | 13.1 |
| Sexual offence              | 9  | 3.6  |
| Robbery                     | 13 | 5.2  |
| Fraud and forgery           | 13 | 5.2  |
| Other theft                 | 66 | 26.3 |
| Criminal damage             | 5  | 2.0  |
| Drug offence                | 15 | 6.0  |
| Other                       | 80 | 31.9 |

Supplemental Table 3: Discrimination parameters and statistics of OxSHIP based on the original model

|                | Self-harm | No self-harm | Total |
|----------------|-----------|--------------|-------|
| Score $\geq$ 5 | 6         | 124          | 130   |
| Score <5       | 11        | 401          | 412   |
| Total          | 17        | 525          | 542   |

Sensitivity: 35% (14-62%)

PPV: 5% (2-9%)

Specificity: 76% (73-80%)

NPV: 97% (96-98%)

Supplemental Table 4: Discrimination parameters and statistics of the original OxSHIP model based on all possible cut-off scores

| Score | TP | TN  | Sens | Spec | PPV | NPV |
|-------|----|-----|------|------|-----|-----|
| 0+    | 17 | 0   | 100% | 0%   | 3%  | --- |
| 1+    | 17 | 80  | 94%  | 15%  | 3%  | 99% |
| 2+    | 16 | 196 | 82%  | 37%  | 4%  | 98% |
| 3+    | 14 | 276 | 71%  | 53%  | 5%  | 98% |
| 4+    | 12 | 340 | 59%  | 65%  | 5%  | 98% |
| 5+    | 10 | 401 | 35%  | 76%  | 5%  | 97% |
| 6+    | 6  | 457 | 35%  | 87%  | 8%  | 98% |
| 7+    | 6  | 493 | 24%  | 94%  | 11% | 97% |
| 8+    | 4  | 513 | 18%  | 98%  | 20% | 97% |
| 9+    | 3  | 521 | 12%  | 99%  | 33% | 97% |
| 10+   | 2  | 524 | 0%   | 100% | 0%  | 97% |
| 11    | 0  | 525 | 0%   | 100% | 0%  | 97% |

Supplemental Table 5: Coefficients for each item in the optimised model

|    | Question                                                                                                                                                                     | Coefficient |
|----|------------------------------------------------------------------------------------------------------------------------------------------------------------------------------|-------------|
| 1  | Are you currently diagnosed with an emotional or psychiatric disorder or are you currently being prescribed medication for emotional, psychological or psychiatric problems? | -0.8785     |
| 2  | Have you ever had psychiatric treatment by a medical health professional?                                                                                                    | 0.8368      |
| 4  | Have you ever attempted suicide or self-harmed inside prison?                                                                                                                | 2.2428      |
| 5  | Do you have current thoughts about wanting to harm yourself?                                                                                                                 | 2.1095      |
| 6  | Have any of your family died by suicide or self-harmed themselves?                                                                                                           | -1.1086     |
| 8  | Have you experienced homelessness in the past for a month or more?                                                                                                           | 0.8132      |
| 9  | Were you ever in local authority care before the age of 16?                                                                                                                  | 0.8529      |
| 10 | Have you been in prison before?                                                                                                                                              | -0.6072     |
| 11 | Do you feel that the future is hopeless and that things cannot improve?                                                                                                      | -0.8742     |

LC (linear combination)= $\sum$  beta\*value of risk factor

Risk of self-harm incident within 6 months =  $1 - 0.9723^{\text{exp(LC)}}$

Supplemental Figure 1: Area under the receiver operating characteristics curve (AUC) for the original screening tool

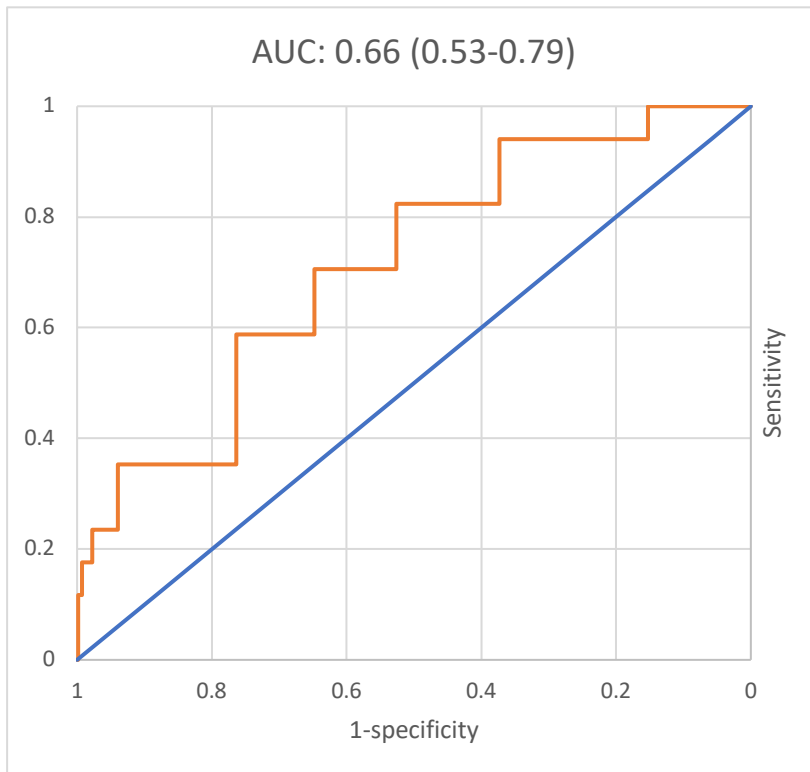

Supplemental Figure 2: Calibration plot for the original screening tool

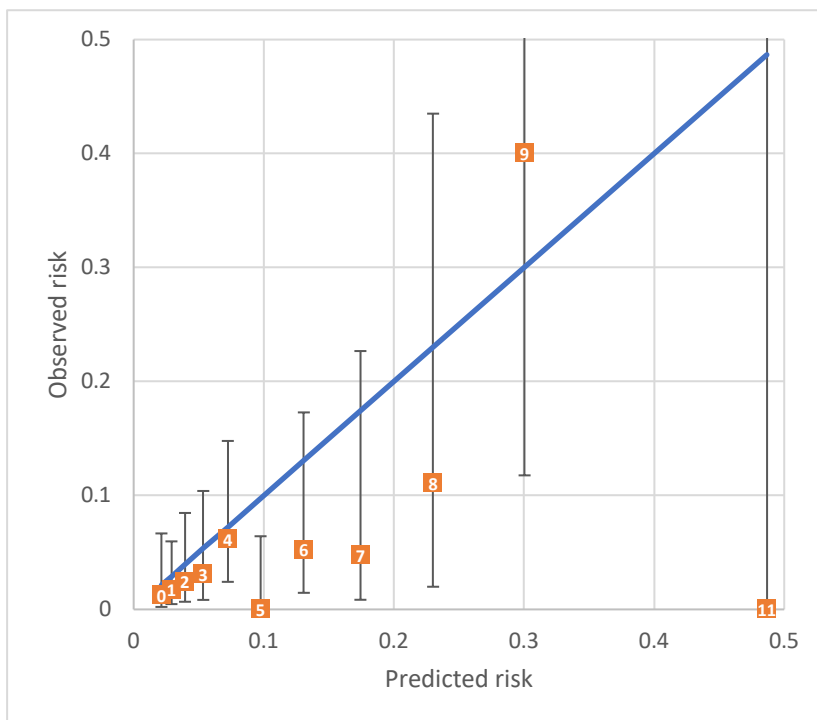

# **Clinical prediction rule for male prisoners for risk of self-harm – protocol**

## **Study Summary**

### **Design**

Cohort study of prisoners in two prisons: HMP Wormwood Scrubs, HMP Woodhill. Prisoners were screened between Nov 11, 2015 and May 5, 2016 using an 11-item screening questionnaire (with a total score ranging from 0 to 11).

### **Outputs**

The main objective is to assess a model that estimates the probability of self-harm within 6 months of screening, with appropriate measures of predictive accuracy, using the pre-specified risk cut-off.

### **Statistical Analysis**

Statistical analysis will be based on Cox proportional hazard regression, adjusting for the score at screening. No other variables will be included in the model.

The pre-specified cut-off for low vs. high risk is  $<5$  vs  $\geq 5$ .

Items scored as 'D/K' will be recoded as '0'. This is consistent with how overall scores were previously derived. There is no missing data.

The 'at-risk' period will span from the interview date until self-harm, transfer, release, or end of follow-up (6 months post-interview). Re-entry after transfer or release will not be included.

### **Validation and goodness of fit**

Sensitivity, specificity, and positive and negative predictive values will be calculated using the pre-specified cut-off.

Internal validation will be assessed using bootstrapping.

Predictive accuracy will be summarised using the concordance index and the Brier score.

The proportions of predicted and observed events at different screening scores will be compared using a calibration plot.

## Screening questionnaire

| #                  | Question                                                                                                                                                                     | Yes/No     |
|--------------------|------------------------------------------------------------------------------------------------------------------------------------------------------------------------------|------------|
| 1                  | Are you currently diagnosed with an emotional or psychiatric disorder or are you currently being prescribed medication for emotional, psychological or psychiatric problems? |            |
| 2                  | Have you ever had psychiatric treatment by a medical health professional?                                                                                                    |            |
| 3                  | Have you ever attempted suicide or self-harmed outside prison?                                                                                                               |            |
| 4                  | Have you ever attempted suicide or self-harmed inside prison?                                                                                                                |            |
| 5                  | Do you have current thoughts about wanting to harm yourself?                                                                                                                 |            |
| 6                  | Have any of your family died by suicide or self-harmed themselves?                                                                                                           |            |
| 7                  | Do you have friends or family that you feel close to?                                                                                                                        |            |
| 8                  | Have you experienced homelessness in the past for a month or more?                                                                                                           |            |
| 9                  | Were you ever in local authority care before the age of 16?                                                                                                                  |            |
| 10                 | Have you been in prison before?                                                                                                                                              |            |
| 11                 | Do you feel that the future is hopeless and that things cannot improve?                                                                                                      |            |
| <b>Total score</b> |                                                                                                                                                                              | <b>/11</b> |
